# Supplementary material for: Assessment of the Attitude and Fears of the Physicians of Pakistan regarding Artificial Intelligence: a cross-sectional survey in 2024
Source: Research Square preprint supplement (doi:10.21203/rs.3.rs-5746871/v1), 2025-05-28
Supplement: Supplementary file 1 [file 9f6ffa50883c66a3e7184448.docx]

|  | **N** | **Positive subscale**  ***Mean (SD)*** | **Negative subscale**  ***Mean (SD)*** | **Fear score**  ***Mean (SD)*** |
| --- | --- | --- | --- | --- |
| **Gender** |  |  |  |  |
| Male | 204 | 3.57 (0.58) | 2.80 (0.63) | 2.71 (0.67) |
| Female | 189 | 3.35 (0.57) | 2.71 (0.58) | 2.61 (0.66) |
| ***P-value*** |  | *<****0.001*** | *0.17* | *0.13* |
| **Age Groups** |  |  |  |  |
| 20-29 | 317 | 3.43 (0.58) | 2.77 (0.61) | 2.67 (0.69) |
| 30-39 | 44 | 3.5 (0.63) | 2.73 (0.68) | 2.68 (0.59) |
| 40-49 | 15 | 3.67 (0.59) | 2.83 (0.44) | 2.77 (0.45) |
| 50-59 | 9 | 3.65 (0.63) | 2.60 (0.50) | 2.40 (0.65) |
| 60-69 | 6 | 3.83 (0.75) | 2.33 (0.38) | 2.17 (0.50) |
| ***P-value*** |  | *0.19* | *0.40* | *0.27* |
| **NYP** |  |  |  |  |
| 1-5 years | 327 | 3.45 (0.59) | 2.77 (0.61) | 2.65 (0.66) |
| 6-10 years | 30 | 3.45 (0.47) | 2.67 (0.62) | 2.90 (0.76) |
| 11-15 years | 11 | 3.62 (0.82) | 2.84 (0.65) | 2.85 (0.70) |
| 16-20 years | 6 | 3.21 (0.33) | 2.85 (0.22) | 2.50 (0.17) |
| 21-25 years | 6 | 3.94 (0.58) | 2.71 (0.61) | 2.63 (0.58) |
| 26-30 years | 4 | 3.21 (0.44) | 2.22 (0.26) | 1.85 (0.34) |
| More than 30 years | 9 | 3.74 (0.67) | 2.58 (0.52) | 2.56 (0.54) |
| ***P-value*** |  | *0.18* | *0.53* | *0.08* |
| **Designation** |  |  |  |  |
| House Officer | 201 | 3.45 (0.58) | 2.75 (0.60) | 2.63 (0.67) |
| Medical Officer | 52 | 3.56 (0.62) | 2.78 (0.67) | 2.76 (0.77) |
| Senior Medical Officer | 11 | 3.33 (0.89) | 2.34 (0.53) | 2.35 (0.54) |
| Post-graduate Resident | 87 | 3.40 (0.56) | 2.81 (0.59) | 2.74 (0.67) |
| Consultant | 42 | 3.55 (0.56) | 2.74 (0.57) | 2.63 (0.53) |
| ***P-value*** |  | *0.57* | *0.30* | *0.24* |
| **Province** |  |  |  |  |
| Punjab | 284 | 3.49 (0.60) | 2.76 (0.60) | 2.67 (0.68) |
| Sindh | 51 | 3.46 (0.59) | 2.84 (0.64) | 2.72 (0.65) |
| Balochistan | 4 | 3.54 (0.37) | 2.63 (0.37) | 2.55 (0.64) |
| Khyber Pakhtunkhwa | 52 | 3.29 (0.52) | 2.67(0.63) | 2.58(0.59) |
| Islamabad | 2 | 3.75 (0.12) | 3.06 (1.33) | 2.7 (1.27) |
| ***P-value*** |  | *0.23* | *0.59* | *0.87* |
| **Sector** |  |  |  |  |
| Government | 274 | 3.48 (0.56) | 2.76 (0.58) | 2.64 (0.64) |
| Private | 78 | 3.48 (0.56) | 2.71 (0.66) | 2.63 (0.70) |
| Both | 41 | 3.30 (0.77) | 2.82 (0.66) | 2.86 (0.78) |
| ***P-value*** |  | *0.17* | *0.6* | *0.14* |

**Table 3** – **Correlation of attitude and fears of participants with different demographic variables.** NYP = Number of Years in Practice
