# Supplementary material for: Assessment of the Attitude and Fears of the Physicians of Pakistan regarding Artificial Intelligence: a cross-sectional survey in 2024
Source: Research Square preprint supplement (doi:10.21203/rs.3.rs-5746871/v1), 2025-05-28
Supplement: Supplementary file 1 [file 38d3ae10a8d4953d146c96b8.pdf]

# Assessments of the attitude and fears of the medical fraternity of Pakistan regarding artificial intelligence.

We are conducting a research study on the attitudes and fears of healthcare workers in Pakistan towards artificial intelligence. The purpose of this study is to gain a better understanding of how healthcare professionals in Pakistan perceive the use of AI in their field. This information will be used to inform decisions about the adoption and implementation of AI in the healthcare sector.

As a participant in this study, you will be asked to complete a questionnaire that will take approximately five minutes to complete. Your participation in this study is voluntary and you may choose not to participate or to withdraw at any time without any negative consequences.

Please be assured that your confidentiality will be respected and no personal information, such as your name or any other identifying details, will be collected or shared. You will not be compensated for participating in this study.

If you have any questions or concerns about the study, or if you experience any discomfort or inconvenience while participating, please do not hesitate to contact us.

Thank you for considering participating in our research project. Your participation is greatly appreciated

---

\* Indicates required question

1. Please write the name of the person who sent you this form.

\_\_\_\_\_

2. By marking below you agree to the above mentioned terms. \*

*Mark only one oval.*

☐ Agree

## Socio-Demographic Information

3. What is your age? (please answer in numerical form e,g; 45, 56 etc) \*

\_\_\_\_\_

4. Gender \*

*Mark only one oval.*

☐ Male

☐ Female

☐ Other

5. How long have you been practicing? (Years) \*

*Mark only one oval.*

- ☐ 1-5 years
- ☐ 6-10 years
- ☐ 11-15 years
- ☐ 16-20 years
- ☐ 21-25 years
- ☐ 26-30 years
- ☐ More than 30 years

6. What is your designation? \*

*Mark only one oval.*

- ☐ House officer
- ☐ Medical officer
- ☐ Senior medical officer
- ☐ Post graduate Resident
- ☐ Consultant
- ☐ Demonstrator
- ☐ Family Physician -
- ☐ Other: \_\_\_\_\_

7. What is the city of your practice? \*

\_\_\_\_\_

8. Working sector \*

*Mark only one oval.*

- ☐ Government
- ☐ Private
- ☐ Both (Govt. and Private)

Questions to assess attitude towards AI

9. People like me will suffer if Artificial Intelligence is used more and more. \*

*Mark only one oval.*

- ☐ Strongly disagree
- ☐ Disagree
- ☐ Neutral
- ☐ Agree
- ☐ Strongly agree

10. I would like to use Artificial Intelligence in my own job. \*

*Mark only one oval.*

- ☐ Strongly disagree
- ☐ Disagree
- ☐ Neutral
- ☐ Agree
- ☐ Strongly agree

11. Much of society will benefit from a future full of Artificial Intelligence \*

*Mark only one oval.*

- ☐ Strongly disagree
- ☐ Disagree
- ☐ Neutral
- ☐ Agree
- ☐ Strongly agree

12. Artificially intelligent systems can perform better than humans. \*

*Mark only one oval.*

- ☐ Strongly disagree
- ☐ Disagree
- ☐ Neutral
- ☐ Agree
- ☐ Strongly agree

13. I shiver with discomfort when I think about future uses of Artificial Intelligence. \*

*Mark only one oval.*

- ☐ Strongly disagree
- ☐ Disagree
- ☐ Neutral
- ☐ Agree
- ☐ Strongly agree

14. Artificial Intelligence is used to spy on people \*

*Mark only one oval.*

- ☐ Strongly Disagree
- ☐ Disagree
- ☐ Neutral
- ☐ Agree
- ☐ Strongly Agree

15. There are many beneficial applications of Artificial Intelligence. \*

*Mark only one oval.*

- ☐ Strongly disagree
- ☐ Disagree
- ☐ Neutral
- ☐ Agree
- ☐ Strongly agree

16. An artificially intelligent agent would be better than an employee in many routine jobs. \*

*Mark only one oval.*

- ☐ Strongly disagree
- ☐ Disagree
- ☐ Neutral
- ☐ Agree
- ☐ Strongly agree

17. I would be grateful if you could select agree. \*

*Mark only one oval.*

- ☐ Strongly Disagree
- ☐ Disagree
- ☐ Neutral
- ☐ Agree
- ☐ Strongly Agree

18. Artificial Intelligence is exciting. \*

*Mark only one oval.*

- ☐ Strongly disagree
- ☐ Disagree
- ☐ Neutral
- ☐ Agree
- ☐ Strongly agree

19. Artificial Intelligence can have positive impacts on people's wellbeing. \*

*Mark only one oval.*

- ☐ Strongly disagree
- ☐ Disagree
- ☐ Neutral
- ☐ Agree
- ☐ Strongly agree

20. I think Artificial Intelligence is dangerous. \*

*Mark only one oval.*

- ☐ Strongly disagree
- ☐ Disagree
- ☐ Neutral
- ☐ Agree
- ☐ Strongly agree

21. Artificial Intelligence might take control of people. \*

*Mark only one oval.*

- ☐ Strongly Disagree
- ☐ Disagree
- ☐ Neutral
- ☐ Agree
- ☐ Strongly Agree

22. I find Artificial Intelligence sinister. \*

*Mark only one oval.*

- ☐ Strongly Disagree
- ☐ Disagree
- ☐ Neutral
- ☐ Agree
- ☐ Strongly Agree

23. I am interested in using artificially intelligent systems in my daily life. \*

*Mark only one oval.*

- ☐ Strongly Disagree
- ☐ Disagree
- ☐ Neutral
- ☐ Agree
- ☐ Strongly Agree

24. I think artificially intelligent systems make many errors. \*

*Mark only one oval.*

- ☐ Strongly disagree
- ☐ Disagree
- ☐ Neutral
- ☐ Agree
- ☐ Strongly agree

25. I am impressed by what Artificial Intelligence can do. \*

*Mark only one oval.*

- ☐ Strongly Disagree
- ☐ Disagree
- ☐ Neutral
- ☐ Agree
- ☐ Strongly Agree

26. Artificially intelligent systems can help people feel happier. \*

*Mark only one oval.*

- ☐ Strongly disagree
- ☐ Disagree
- ☐ Neutral
- ☐ Agree
- ☐ Strongly agree

27. Organizations use Artificial Intelligence unethically \*

*Mark only one oval.*

- ☐ Strongly disagree
- ☐ Disagree
- ☐ Neutral
- ☐ Agree
- ☐ Strongly Agree

28. Artificial Intelligence can provide new economic opportunities for this country. \*

*Mark only one oval.*

- ☐ Strongly disagree
- ☐ Disagree
- ☐ Neutral
- ☐ Agree
- ☐ Strongly Agree

29. For routine transactions, I would rather interact with an artificially intelligent system than with a human. \*

*Mark only one oval.*

- ☐ Strongly disagree
- ☐ Disagree
- ☐ Neutral
- ☐ Agree
- ☐ Strongly agree

Questions to assess fears regarding AI

30. I believe that AI will not be considerate of the humanly emotions and feelings. \*

*Mark only one oval.*

- ☐ Strongly disagree
- ☐ Disagree
- ☐ Neutral
- ☐ Agree
- ☐ Strongly agree

31. I think that AI will lead to ethical dilemmas in the healthcare industry. \*

*Mark only one oval.*

- ☐ Strongly disagree
- ☐ Disagree
- ☐ Neutral
- ☐ Agree
- ☐ Strongly agree



32. I believe that AI poses a threat to the quality of care provided by healthcare workers. \*

*Mark only one oval.*

☐ Strongly Disagree

☐ Disagree

☐ Neutral

☐ Agree

☐ Strongly Agree

33. I am concerned about the potential impact of AI on my job as a healthcare worker. \*

*Mark only one oval.*

☐ Strongly Disagree

☐ Disagree

☐ Neutral

☐ Agree

☐ Strongly Agree

34. I believe that AI will replace healthcare workers in the future. \*

*Mark only one oval.*

☐ Strongly Disagree

☐ Disagree

☐ Neutral

☐ Agree

☐ Strongly Agree

---

This content is neither created nor endorsed by Google.

Google Forms
