# Supplementary material for: Assessment of the Attitude and Fears of the Physicians of Pakistan regarding Artificial Intelligence: a cross-sectional survey in 2024
Source: Research Square preprint supplement (doi:10.21203/rs.3.rs-5746871/v1), 2025-05-28
Supplement: Supplementary file 2 [file ae15f17c4126a4bab5a375dd.docx]

**Scoring Criteria:**

For the qualitative variable of “attitude”, GAAIS guidelines were used; we scored items marked "positive" as Strongly disagree = 1, Disagree = 2, Neutral = 3, Agree = 4, and Strongly agree = 5. For the items marked “negative,” we scored them in reverse so that Strongly disagree = 5, Disagree = 4, Neutral = 3, Agree = 2, and Strongly agree = 1. Then, using descriptive statistics, we calculated the arithmetic mean of the positive items to form an overall score for the positive subscale and the arithmetic mean of the negative items to form the negative subscale for each response. We did not calculate an overall mean as suggested in the GAAIS guidelines [27]. The higher the score was on each subscale, the more positive the attitude was considered.

For the qualitative variable of "fears”, we used the same criteria as mentioned above but all the questions, in this case, were treated like the items marked negative in GAAIS and scored likewise. Similarly, the arithmetic mean of these items was calculated to form an overall score for the fear scale. The higher the score on fear scale, the lesser the fear would be. Frequencies and percentages were calculated for gender, designation, working sector, NYP, and city of practice while we calculated the arithmetic mean and standard deviation for the age of participants.
