# Supplementary material for: Assessment of the Attitude and Fears of the Physicians of Pakistan regarding Artificial Intelligence: a cross-sectional survey in 2024
Source: Research Square preprint supplement (doi:10.21203/rs.3.rs-5746871/v1), 2025-05-28
Supplement: Supplementary file 3 [file afb81dd146827154e1d7a6c3.docx]

| **Age *(years); mean (SD)*** | 27.88 (7.31) |
| --- | --- |
| **Gender *n (%)*** |  |
| Males | 204 (51.9) |
| Females | 189 (48.1) |
| **NYP *n (%)*** |  |
| 1-5 years | 327 (83.2) |
| 6-10 years | 30 (7.6) |
| 11-15 years | 11 (2.8) |
| 16-20 years | 6 (1.5) |
| 21-25 years | 6 (1.5) |
| 26-30 years | 4 (1) |
| More than 30 years | 9 (2.3) |
| **Designation *n (%)*** |  |
| House Officer | 201 (51.1) |
| Medical Officer | 52 (13.2) |
| Senior Medical Officer | 11 (2.8) |
| Post-graduate Resident | 87 (22.1) |
| Consultant | 42 (10.7) |
| **Province *n (%)*** |  |
| **Punjab** | **284 (72.3)** |
| - Lahore | 215 (54.7) |
| - Kasur | 9 (2.3) |
| - Faislabad | 26 (6.6) |
| - Rahim Yar Khan | 2 (0.5) |
| - Bahawalpur | 3 (0.8) |
| - Rawalpindi | 3 (0.8) |
| - Multan | 4 (1) |
| - Okara | 4 (1) |
| - Sargodha | 2 (0.5) |
| - Mianwali | 1 (0.3) |
| - Chiniot | 2 (0.5) |
| - Gujranwala | 1 (0.3) |
| - Narowal | 1 (0.3) |
| - Sahiwal | 1 (0.3) |
| - Dera Ghazi Khan | 1 (0.3) |
| - Gujrat | 2 (0.5) |
| - Toba Tek Singh | 1 (0.3) |
| - Muzaffargarh | 5 (1.3) |
| **Sindh** | **51 (13)** |
| - Karachi | 50 (12.7) |
| - Panu Aqil | 1 (0.3) |
| - Nawabshah | 1 (0.3) |
| **Khyber Pakhtunkhwa** | **52 (13.2)** |
| - Peshawar | 46 (11.7) |
| - Abbottabad | 2 (0.5) |
| - Nowsehra | 1 (0.3) |
| - Mardan | 2 (0.5) |
| - Bannu | 1 (0.3) |
| **Balochistan** | **4 (1)** |
| - Quetta | 4 (1) |
| **Islamabad** | **2 (0.5)** |
| **Working sector *n (%)*** |  |
| Government | 274 (69.7) |
| Private | 78 (19.8) |
| Both | 41 (10.4) |

**Table 1** – **Demographic data of participants. Bullets under each province represent cities of that province.** NYP = Number of Years in Practice.
