# Supplementary material for: Assessment of the Attitude and Fears of the Physicians of Pakistan regarding Artificial Intelligence: a cross-sectional survey in 2024
Source: Research Square preprint supplement (doi:10.21203/rs.3.rs-5746871/v1), 2025-05-28
Supplement: Supplementary file 4 [file b37035e523e2f0d8922bfc4a.docx]

| **Scale score** | **Mean** | **SD** |
| --- | --- | --- |
| Positive subscale of GAAIS | 3.46 | 0.59 |
| Negative subscale of GAAIS | 2.76 | 0.61 |
| Fear scale | 2.66 | 0.67 |

**Table 2 - Mean and standard deviation for both subscales of GAAIS and the fear scale.** GAAIS**=**The General Attitudes towards Artificial Intelligence Scale
