# Supplementary material for: Assessment of the Attitude and Fears of the Physicians of Pakistan regarding Artificial Intelligence: a cross-sectional survey in 2024
Source: Research Square preprint supplement (doi:10.21203/rs.3.rs-5746871/v1), 2025-05-28
Supplement: Supplementary file 5 [file b980a8d1716d641dd6284c00.docx]

| Variable | Unit of Measurement | Standardized Coefficients β | 95% CI | P value |
| --- | --- | --- | --- | --- |
| Intercept |  | - | 3.1, 4.173 | <0.001 |
| Age | years | 0.204 | -0.009, 0.042 | 0.212 |
| Gender | Male = 1; Female = 2 | -0.182 | -0.331, -0.97 | <0.001 |
| NYP | 1-5 years = 1; 6-10 years = 2; 11-15 years = 3; 16-20 years = 4; 21-25 years = 5; 26-30 years = 6; More than 30 years = 7 | -0.075 | -0.18, 0.104 | 0.610 |
| Designation | House Officer = 1; Medical Officer = 2; Senior Medical Officer = 3; Post-graduate Resident = 4; Consultant = 5; Demonstrator = 6 | -0.034 | -0.062, 0.036 | 0.600 |
| Province | Punjab = 1; Sindh = 2; Balochistan = 3; Khyber Pakhtunkhwa = 4; Islamabad = 5 | -0.09 | -0.106, 0.06 | 0.129 |
| Sector | Government = 1; Private = 2; Both = 3 | -0.125 | -0.201, -0.17 | 0.021 |
| Model Summary | Adjusted R2 = 0.052; P <0.01 | Adjusted R2 = 0.052; P <0.01 | Adjusted R2 = 0.052; P <0.01 | Adjusted R2 = 0.052; P <0.01 |

**Table 4. Multiple linear regression model with the positive subscale of GAAIS as the dependent variable and age, gender, NYP, designation, province, and working sector as independent variable.** NYP = number of years of practice
