# Supplementary material for: Assessment of the Attitude and Fears of the Physicians of Pakistan regarding Artificial Intelligence: a cross-sectional survey in 2024
Source: Research Square preprint supplement (doi:10.21203/rs.3.rs-5746871/v1), 2025-05-28
Supplement: Supplementary file 6 [file d6b898704f9e47b52fea69ff.docx]

| Variable | Unit of Measurement | Standardized Coefficients β | 95% CI | P value |
| --- | --- | --- | --- | --- |
| Intercept |  | - | 2.816, 3.947 | <0.001 |
| Age | years | -0.282 | -0.050, 0.003 | 0.085 |
| Gender | Male = 1; Female = 2 | -0.095 | -0.238, 0.009 | 0.068 |
| NYP | 1-5 years = 1; 6-10 years = 2; 11-15 years = 3; 16-20 years = 4; 21-25 years = 5; 26-30 years = 6; More than 30 years = 7 | 0.136 | -0.079,0.22 | 0.354 |
| Designation | House Officer = 1; Medical Officer = 2; Senior Medical Officer = 3; Post-graduate Resident = 4; Consultant = 5; Demonstrator = 6 | 0.121 | -0.004, 0.100 | 0.071 |
| Province | Punjab = 1; Sindh = 2; Balochistan = 3; Khyber Pakhtunkhwa = 4; Islamabad = 5 | -0.058 | -0.092, 0.026 | 0.274 |
| Sector | Government = 1; Private = 2; Both = 3 | 0.034 | -0.066,0.128 | 0.532 |
| Model Summary | Adjusted R2 = 0.007; P = 0.194 | Adjusted R2 = 0.007; P = 0.194 | Adjusted R2 = 0.007; P = 0.194 | Adjusted R2 = 0.007; P = 0.194 |

**Table 5. Multiple linear regression model with the negative subscale of GAAIS as the dependent variable and age, gender, NYP, designation, province, and working sector as independent variable.** NYP = number of years of practice
