# Supplementary material for: Assessment of the Attitude and Fears of the Physicians of Pakistan regarding Artificial Intelligence: a cross-sectional survey in 2024
Source: Research Square preprint supplement (doi:10.21203/rs.3.rs-5746871/v1), 2025-05-28
Supplement: Supplementary file 7 [file ed3c5d94c3984689a51a908a.docx]

| **Variable** | **Unit of Measurement** | **Standardized Coefficients β** | **95% CI** | **P Value** |
| --- | --- | --- | --- | --- |
| **Intercept** | - |  | 2.777, 4.020 | <0.001 |
| **Age** | years | -0.361 | -0.062, -0.004 | 0.027 |
| **Gender** | Male = 1; Female = 2 | -0.096 | -0.264, 0.007 | 0.064 |
| **NYP** | 1-5 years = 1; 6-10 years = 2; 11-15 years = 3; 16-20 years = 4; 21-25 years = 5; 26-30 years = 6; More than 30 years = 7 | 0.20 | -0.5, 0.279 | 0.171 |
| **Designation** | House Officer = 1; Medical Officer = 2; Senior Medical Officer = 3; Post-graduate Resident = 4; Consultant = 5; Demonstrator = 6 | 0.123 | -0.03, 0.111 | 0.064 |
| **Province** | Punjab = 1; Sindh = 2; Balochistan = 3; Khyber Pakhtunkhwa = 4; Islamabad = 5 | -0.067 | -0.107, 0.022 | 0.198 |
| **Sector** | Government = 1; Private = 2; Both = 3 | 0.114 | 0.007, 0.22 | 0.037 |

**Table 6. Multiple linear regression model with the fear scale as the dependent variable and age, gender, NYP, designation, province, and working sector as independent variable.** NYP = number of years of practice
