# Supplementary material for: Assessment of the Attitude and Fears of the Physicians of Pakistan regarding Artificial Intelligence: a cross-sectional survey in 2024
Source: Research Square preprint supplement (doi:10.21203/rs.3.rs-5746871/v1), 2025-05-28
Supplement: Supplementary file 8 [file f4eeafc19f97c683f2ea851e.docx]

# Frequency and Percentage of Responses for Each Question

## For routine transactions, I would rather interact with an artificially intelligent system than with a human.

| Response | Frequency | Percentage |
| --- | --- | --- |
| Agree | 118 | 30.03% |
| Disagree | 104 | 26.46% |
| Neutral | 80 | 20.36% |
| Strongly Agree | 48 | 12.21% |
| Strongly Disagree | 43 | 10.94% |

## Artificial Intelligence can provide new economic opportunities for this country.

| Response | Frequency | Percentage |
| --- | --- | --- |
| Agree | 193 | 49.11% |
| Strongly Agree | 67 | 17.05% |
| Neutral | 66 | 16.79% |
| Disagree | 49 | 12.47% |
| Strongly Disagree | 18 | 4.58% |

## Organizations use Artificial Intelligence unethically

| Response | Frequency | Percentage |
| --- | --- | --- |
| Agree | 158 | 40.2% |
| Neutral | 121 | 30.79% |
| Strongly agree | 65 | 16.54% |
| Disagree | 46 | 11.7% |
| Strongly disagree | 3 | 0.76% |

## Artificially intelligent systems can help people feel happier.

| Response | Frequency | Percentage |
| --- | --- | --- |
| Agree | 143 | 36.39% |
| Neutral | 124 | 31.55% |
| Disagree | 81 | 20.61% |
| Strongly Agree | 27 | 6.87% |
| Strongly Disagree | 18 | 4.58% |

## I am impressed by what Artificial Intelligence can do.

| Response | Frequency | Percentage |
| --- | --- | --- |
| Agree | 222 | 56.49% |
| Strongly Agree | 72 | 18.32% |
| Neutral | 66 | 16.79% |
| Disagree | 27 | 6.87% |
| Strongly Disagree | 6 | 1.53% |

## I think artificially intelligent systems make many errors.

| Response | Frequency | Percentage |
| --- | --- | --- |
| Agree | 172 | 43.77% |
| Neutral | 111 | 28.24% |
| Disagree | 70 | 17.81% |
| Strongly agree | 36 | 9.16% |
| Strongly disagree | 4 | 1.02% |

## I am interested in using artificially intelligent systems in my daily life.

| Response | Frequency | Percentage |
| --- | --- | --- |
| Agree | 199 | 50.64% |
| Neutral | 77 | 19.59% |
| Disagree | 60 | 15.27% |
| Strongly Agree | 42 | 10.69% |
| Strongly Disagree | 15 | 3.82% |

## I find Artificial Intelligence sinister.

| Response | Frequency | Percentage |
| --- | --- | --- |
| Neutral | 144 | 36.64% |
| Disagree | 108 | 27.48% |
| Agree | 101 | 25.7% |
| Strongly agree | 23 | 5.85% |
| Strongly disagree | 17 | 4.33% |

## Artificial Intelligence might take control of people.

| Response | Frequency | Percentage |
| --- | --- | --- |
| Agree | 163 | 41.48% |
| Neutral | 88 | 22.39% |
| Disagree | 71 | 18.07% |
| Strongly agree | 50 | 12.72% |
| Strongly disagree | 21 | 5.34% |

## I think Artificial Intelligence is dangerous.

| Response | Frequency | Percentage |
| --- | --- | --- |
| Agree | 120 | 30.53% |
| Neutral | 116 | 29.52% |
| Disagree | 95 | 24.17% |
| Strongly agree | 49 | 12.47% |
| Strongly disagree | 13 | 3.31% |

## Artificial Intelligence can have positive impacts on people's wellbeing.

| Response | Frequency | Percentage |
| --- | --- | --- |
| Agree | 209 | 53.18% |
| Neutral | 97 | 24.68% |
| Strongly Agree | 44 | 11.2% |
| Disagree | 37 | 9.41% |
| Strongly Disagree | 6 | 1.53% |

## Artificial Intelligence is exciting.

| Response | Frequency | Percentage |
| --- | --- | --- |
| Agree | 226 | 57.51% |
| Strongly Agree | 67 | 17.05% |
| Neutral | 67 | 17.05% |
| Disagree | 25 | 6.36% |
| Strongly Disagree | 8 | 2.04% |

## An artificially intelligent agent would be better than an employee in many routine jobs.

| Response | Frequency | Percentage |
| --- | --- | --- |
| Disagree | 128 | 32.57% |
| Agree | 101 | 25.7% |
| Neutral | 100 | 25.45% |
| Strongly Disagree | 40 | 10.18% |
| Strongly Agree | 24 | 6.11% |

## There are many beneficial applications of Artificial Intelligence.

| Response | Frequency | Percentage |
| --- | --- | --- |
| Agree | 225 | 57.25% |
| Strongly Agree | 100 | 25.45% |
| Neutral | 42 | 10.69% |
| Disagree | 22 | 5.6% |
| Strongly Disagree | 4 | 1.02% |

## I shiver with discomfort when I think about future uses of Artificial Intelligence.

| Response | Frequency | Percentage |
| --- | --- | --- |
| Disagree | 126 | 32.06% |
| Agree | 101 | 25.7% |
| Neutral | 101 | 25.7% |
| Strongly disagree | 39 | 9.92% |
| Strongly agree | 26 | 6.62% |

## Artificially intelligent systems can perform better than humans.

| Response | Frequency | Percentage |
| --- | --- | --- |
| Disagree | 121 | 30.79% |
| Agree | 105 | 26.72% |
| Neutral | 98 | 24.94% |
| Strongly Disagree | 48 | 12.21% |
| Strongly Agree | 21 | 5.34% |

## Much of society will benefit from a future full of Artificial Intelligence

| Response | Frequency | Percentage |
| --- | --- | --- |
| Agree | 216 | 54.96% |
| Neutral | 72 | 18.32% |
| Strongly Agree | 49 | 12.47% |
| Disagree | 44 | 11.2% |
| Strongly Disagree | 12 | 3.05% |

## I would like to use Artificial Intelligence in my own job.

| Response | Frequency | Percentage |
| --- | --- | --- |
| Agree | 200 | 50.89% |
| Neutral | 76 | 19.34% |
| Strongly Agree | 54 | 13.74% |
| Disagree | 45 | 11.45% |
| Strongly Disagree | 18 | 4.58% |

## People like me will suffer if Artificial Intelligence is used more and more.

| Response | Frequency | Percentage |
| --- | --- | --- |
| Disagree | 124 | 31.55% |
| Agree | 109 | 27.74% |
| Neutral | 96 | 24.43% |
| Strongly disagree | 32 | 8.14% |
| Strongly agree | 32 | 8.14% |

## Artificial Intelligence is used to spy on people

| Response | Frequency | Percentage |
| --- | --- | --- |
| Agree | 147 | 37.4% |
| Neutral | 120 | 30.53% |
| Strongly agree | 57 | 14.5% |
| Disagree | 56 | 14.25% |
| Strongly disagree | 13 | 3.31% |

## I believe that AI will replace healthcare workers in the future.

| Response | Frequency | Percentage |
| --- | --- | --- |
| Disagree | 131 | 33.33% |
| Agree | 105 | 26.72% |
| Neutral | 78 | 19.85% |
| Strongly disagree | 54 | 13.74% |
| Strongly agree | 25 | 6.36% |

## I am concerned about the potential impact of AI on my job as a healthcare worker.

| Response | Frequency | Percentage |
| --- | --- | --- |
| Agree | 135 | 34.35% |
| Disagree | 113 | 28.75% |
| Neutral | 93 | 23.66% |
| Strongly agree | 34 | 8.65% |
| Strongly disagree | 18 | 4.58% |

## I believe that AI poses a threat to the quality of care provided by healthcare workers.

| Response | Frequency | Percentage |
| --- | --- | --- |
| Agree | 133 | 33.84% |
| Disagree | 100 | 25.45% |
| Neutral | 92 | 23.41% |
| Strongly agree | 56 | 14.25% |
| Strongly disagree | 12 | 3.05% |

## I think that AI will lead to ethical dilemmas in the healthcare industry.

| Response | Frequency | Percentage |
| --- | --- | --- |
| Agree | 189 | 48.09% |
| Neutral | 79 | 20.1% |
| Strongly agree | 71 | 18.07% |
| Disagree | 49 | 12.47% |
| Strongly disagree | 5 | 1.27% |

## I believe that AI will not be considerate of the humanly emotions and feelings.

| Response | Frequency | Percentage |
| --- | --- | --- |
| Agree | 174 | 44.27% |
| Strongly agree | 96 | 24.43% |
| Neutral | 72 | 18.32% |
| Disagree | 36 | 9.16% |
| Strongly disagree | 15 | 3.82% |
